# Supplementary material
Source: PubMed Central journal article supplement (PMC3943204)

Thumb Inhibitor Binding Eliminates Functionally Important Dynamics in the Hepatitis C Virus RNA Polymerase

Brittany Davis and Ian F. Thorpe\*

Supporting Information

Supporting Tables

Table SI. Comparison between amino acid composition of structural motifs in NS5B and other RdRps

| <b><u>Domains</u></b>            | <b><u>PV</u></b>            | <b><u>CVB3</u></b>          | <b><u>HRV16</u></b>         | <b><u>FMDV</u></b>          | <b><u>NS5B</u></b>  |
|----------------------------------|-----------------------------|-----------------------------|-----------------------------|-----------------------------|---------------------|
| <b>Fingers</b>                   | 1-68, 96-190,<br>269-286    | 1-68, 96-<br>190, 271-287   | 1-68, 96-<br>190, 269-285   | 1-66, 97-<br>195, 280-296   | 1-188, 224-<br>308  |
| <b>Palm</b>                      | 69-95, 191-<br>268, 287-380 | 69-95, 191-<br>270, 288-381 | 69-95, 191-<br>268, 286-279 | 67-96, 196-<br>279, 297-392 | 189-223,<br>309-270 |
| <b>Thumb</b>                     | 381-461                     | 382-462                     | 380-460                     | 393-470                     | 371-562             |
| <b><u>Motifs</u></b>             |                             |                             |                             |                             |                     |
| <b>A</b>                         | 229-240                     | 229-240                     | 229-240                     | 236-247                     | 216-227             |
| <b>B</b>                         | 293-312                     | 294-313                     | 292-311                     | 303-322                     | 287-306             |
| <b>C</b>                         | 322-335                     | 323-336                     | 321-334                     | 332-345                     | 312-325             |
| <b>D</b>                         | 338-362                     | 339-363                     | 337-361                     | 348-373                     | 332-353             |
| <b>E</b>                         | 363-380                     | 364-381                     | 362-379                     | 374-392                     | 354-372             |
| <b>F</b>                         | 153-178                     | 153-178                     | 153-178                     | 158-183                     | 135-162             |
| <b>G</b>                         | 113-120                     | 113-120                     | 113-120                     | 114-121                     | 95-99               |
| <b><u>Functional Regions</u></b> |                             |                             |                             |                             |                     |
| <b>I</b>                         | 107-112                     | 107-112                     | 107-112                     | 108-113                     | 91-94               |
| <b>II</b>                        | 184-200                     | 184-200                     | 184-200                     | 189-205                     | 168-184             |
| <b>III</b>                       | 405-420                     | 406-421                     | 404-419                     | 416--430                    | 401-414             |

**PID to NS5B (%)**      10.38              8.80              9.15              11.44              -

PV: Poliovirus, CVB3: coxsackievirus B3, HRV16: Human rhinovirus serotype 16, FMDV: Foot-and-mouth disease virus.

Sequence identity was computed with the Sequences Identities and Similarities Server (<http://imed.med.ucm.es/Tools/sias.html>). The Blosum 62 scoring matrix was used with a creating gap penalty of 10 and an extending gap penalty of 0.2. Percent Identity (PID) was calculated using the equation:  $PID=100*((\text{Identical position}) / (\text{Length of the alignment}))$

Table SII. Backbone RMSD (Å) between PDB coordinates and MD average structures of NS5B, computed via aligning the palm domain

|                     | 1YUY | 1YV2 | 2WHO | Apo  |
|---------------------|------|------|------|------|
| <u>1YV2</u>         |      |      |      |      |
| Palm                | 0.43 | -    | -    | -    |
| Fingers + Thumb     | 1.85 |      |      |      |
| Thumb               | 2.59 |      |      |      |
| <u>2WHO</u>         |      |      |      |      |
| Palm                | 0.51 | 0.60 | -    | -    |
| Fingers + Thumb     | 1.23 | 1.56 |      |      |
| Thumb               | 1.69 | 2.12 |      |      |
| <u>Free</u>         |      |      |      |      |
| Palm                | 0.77 | 0.78 | 0.66 | -    |
| Fingers + Thumb     | 2.42 | 3.37 | 2.72 |      |
| Thumb               | 3.29 | 4.78 | 3.83 |      |
| <u>Ligand Bound</u> |      |      |      |      |
| Palm                | 1.17 | 1.13 | 1.06 | 0.92 |
| Fingers + Thumb     | 4.54 | 5.55 | 5.10 | 3.24 |
| Thumb               | 6.31 | 7.88 | 7.22 | 4.36 |

Alignment was carried out by superimposing residues 181-222 and 281-366 which constitute the palm domain of the NS5B. For the purposes of the RMSD calculation, the fingers domain corresponds to residues 1-20, 41-180 and 222-280 while the thumb domain corresponds to residues 21-40 and 367-531.

Table SIII. Width of RNA duplex channel in NS5B

|                  | Distance $\pm \sigma$ (Å) |
|------------------|---------------------------|
| 2WHO coordinates | 16.2                      |
| apo simulations  |                           |
| all              | 14.7 $\pm$ 1.4            |
| 100-220 ns       | 14.2 $\pm$ 1.4            |
| 221-300 ns       | 15.5 $\pm$ 1.7            |

|            |           |
|------------|-----------|
| 301-400 ns | 14.5 ±0.9 |
|------------|-----------|

---

ligand bound simulations

|     |           |
|-----|-----------|
| all | 12.3 ±0.6 |
|-----|-----------|

|            |           |
|------------|-----------|
| 100-240 ns | 12.5 ±0.6 |
|------------|-----------|

|            |           |
|------------|-----------|
| 241-400 ns | 12.1 ±0.6 |
|------------|-----------|

---

The distance between C $\alpha$  atoms of S95 and N406 in NS5B was used as a surrogate for the channel width.  $\sigma$  = one standard deviation.

Table SIV. Width of RNA template channel in NS5B

|                          | Distance $\pm \sigma$ (Å) |
|--------------------------|---------------------------|
| 2WHO coordinates         | 13.9                      |
| apo simulations          |                           |
| all                      | 17.2 $\pm$ 1.5            |
| 100-220 ns               | 16.8 $\pm$ 1.7            |
| 221-300 ns               | 17.3 $\pm$ 1.2            |
| 301-400 ns               | 17.6 $\pm$ 1.4            |
| ligand bound simulations |                           |
| all                      | 12.2 $\pm$ 0.8            |
| 100-240 ns               | 12.5 $\pm$ 0.9            |
| 241-400 ns               | 12.0 $\pm$ 0.7            |

---

The distance between C $\alpha$  atoms of S95 and C14 in NS5B was used as a surrogate for the channel width.  $\sigma$  = one standard deviation.

Table SVI. Blocks of residues displaying high levels of motional correlation.

| Block | Mutation Sites    | Block Members and Location                    |
|-------|-------------------|-----------------------------------------------|
| a     | 19, 147, 155, 390 | 18-42, 142-159, 384-420: rear of thumb domain |

|   |                    |                                                                                              |
|---|--------------------|----------------------------------------------------------------------------------------------|
| b | 50, 55, 138, 162   | 1-10, 42-61, 96-126, 133-142, 157-180, 222-232, 256-291, 341-346: rear of fingers domain     |
| c | 71, 81, 85, 177    | 60-93, 105-130, 164-186, 230-262, 283-290: front and left side of fingers domain             |
| d | 95, 121            | 79-139, 160-181, 240-290: top of fingers domain                                              |
| e | 338, 355           | 58-64, 213-222, 298-311, 320-363: bottom of palm                                             |
| f | 432, 441, 442, 445 | 405-416, 421-472, 500-527: top of thumb                                                      |
| g | 316                | 187-204, 218-222, 291-296, 312-322: middle and center of palm, interface with thumb domain   |
| h | 365, 368           | 195-204, 217-220, 357-371, 383-387: middle and center of palm, rear of palm extending to tip |
| i | 494                | 21-23, 28-33, 234-242, 482-503: rear of thumb + small section on left side of fingers        |

### Figure Captions

Figure S1. Comparison of amino acid composition and secondary structural motifs for NS5B and group I RdRps. PV: Poliovirus, CVB3: coxsackievirus B3, HRV16: Human rhinovirus serotype 16, FMDV: Foot-and-mouth disease virus

Figure S2. Comparison of normalized B-factors for C $\alpha$  atoms in the 2WHO crystallographic coordinates to those in MD simulations. The B-factors were normalized by dividing all of the values obtained for a given protein by the maximum B-factor value for that protein. Thus, the normalized B-factor scale for each protein lies between 1 and 0. The normalization procedure partially accounts for the fact that the crystal structure and MD simulations were prepared at different temperatures (100 and 300 K respectively). The plots show that the relative flexibility of specific structural elements along the peptide sequence is qualitatively consistent between 2WHO and the MD simulations. The exception to this observation is motif F located at the interface between the fingers and thumb domains that plays a role in binding RNA template. This region displays significantly enhanced flexibility relative to the remainder of the enzyme in the MD simulations. The free enzyme displays more flexibility than the ligand-bound enzyme due to the change in orientation of the thumb domain that constrains this motif in the ligand-bound enzyme.

Figure S3. Width of RNA duplex channel during NS5B molecular dynamics simulations. The distance between C $\alpha$  atoms of S95 and N406 in NS5B was used as a surrogate for the channel width. The red line corresponds to the ligand-bound enzyme while the black line displays the result obtained for the free

enzyme. The gray box indicates the equilibration period of the trajectory. The circled region corresponds to the portion of the free trajectory that displays elevated SASA for residues lining the RNA template binding channel. Comparison with Figure 4 in the main text reveals that the widths of the RNA template and RNA duplex channels increase in concert with one another.

Figure S4. Covariance matrices constructed from discriminating modes identified from the free enzyme simulations. a) and b) were generated by filtering out only PC mode 1 and 3 from the free enzyme simulations and reconstructing the covariance matrix as described in Methods. Notation in the figure is as shown in Figure 6 of the main text.

Figure S5. Blocks of residues displaying high levels of motional correlation in ligand-free NS5B simulations. These dynamic units are roughly consistent with the known structural motifs of NS5B. However, the simulations allow these structural motifs to be subdivided into more fine grained motional units, offering more detailed information about how the motion of different regions of NS5B is connected. (a) Space filling representations of regions a, b, g and h given in Table SVI, with each region drawn in a separate color. (b) Space filling representations of regions c, d, e, f and i given in Table SVI. For each row the left panel displays the same view given in the left panel of Figure 2 in the main text while the right panel displays the view given in the upper panel of Figure 5 in the main text. Multiple colors for the same region indicate residues participate in more than one dynamic domain.

Movies of principal components that discriminate between free and ligand-bound trajectories are available online.

Figure S1.

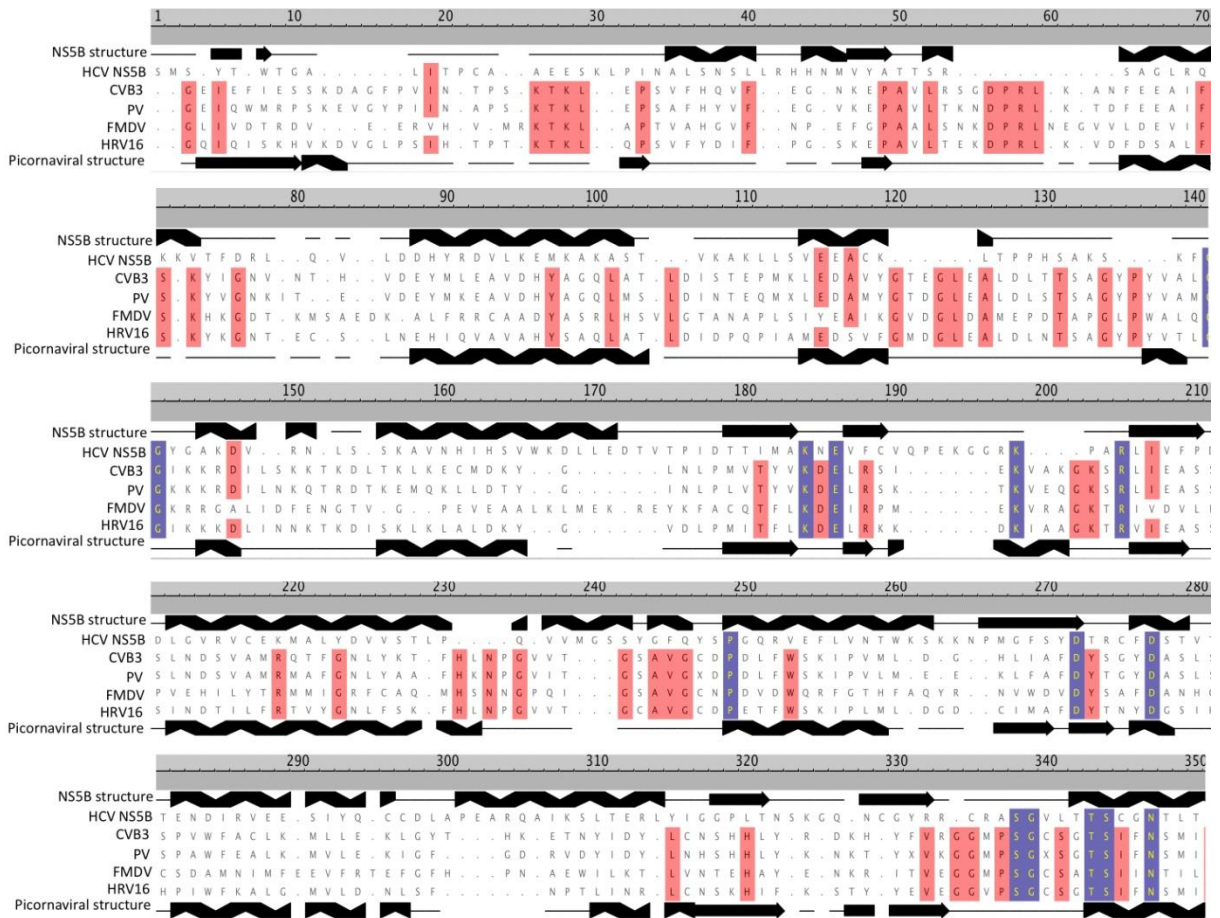

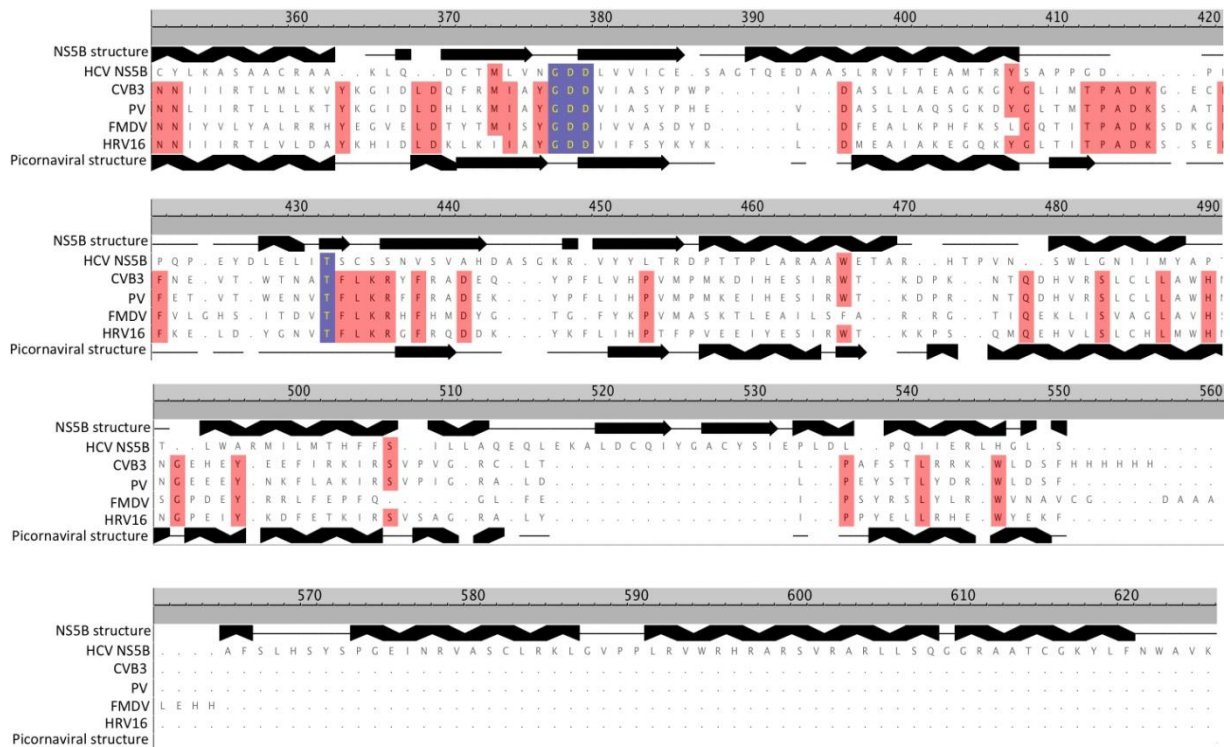

This alignment was performed using the ClustalW server (<http://www.ch.embnet.org/software/ClustalW.html>). The Blossum Scoring matrix was employed with an open gap penalty of 10, end gap penalty of 10, extending gap penalty of 0.05 and a separation gap penalty of 0.05.

Figure S2.

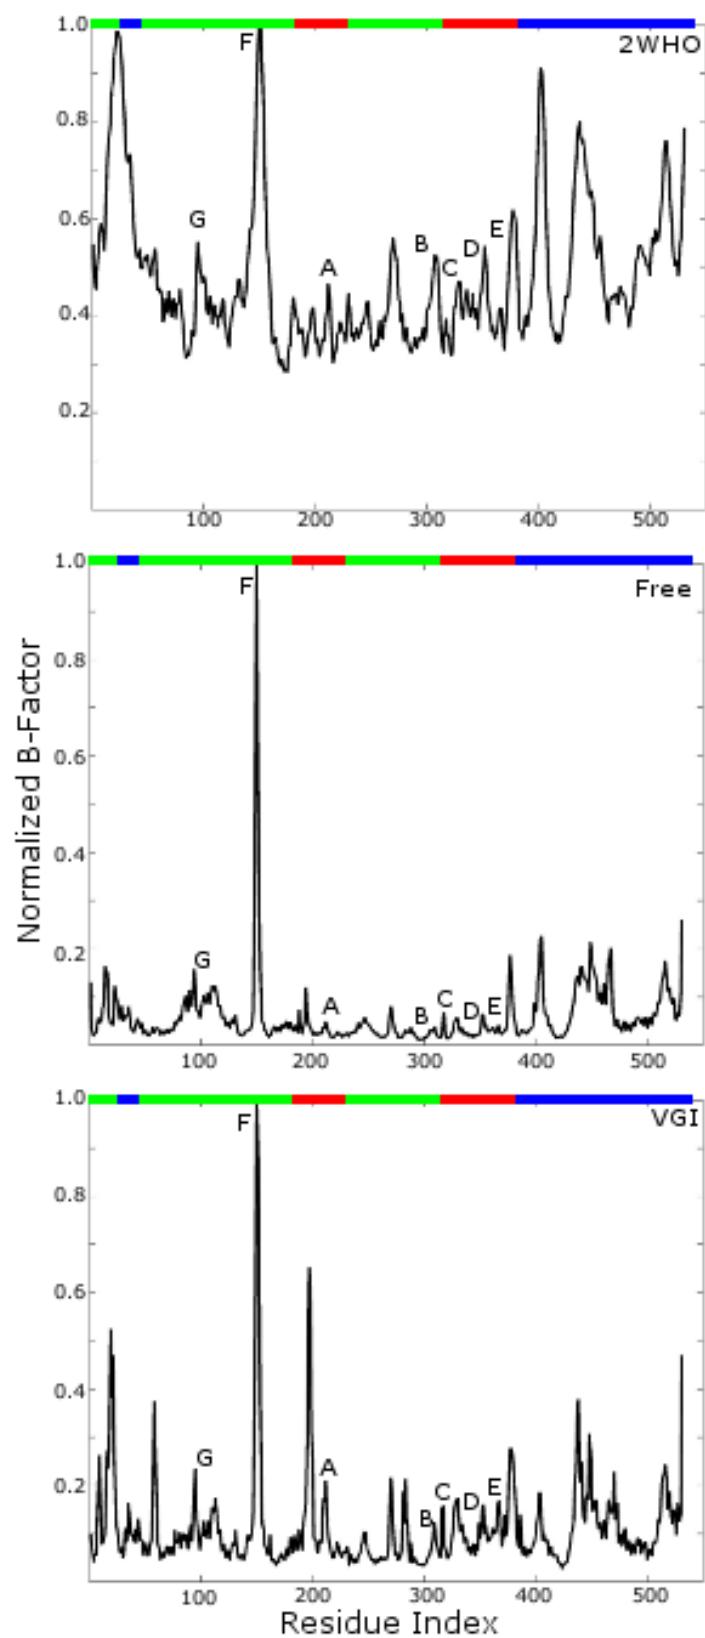



Figure S3.

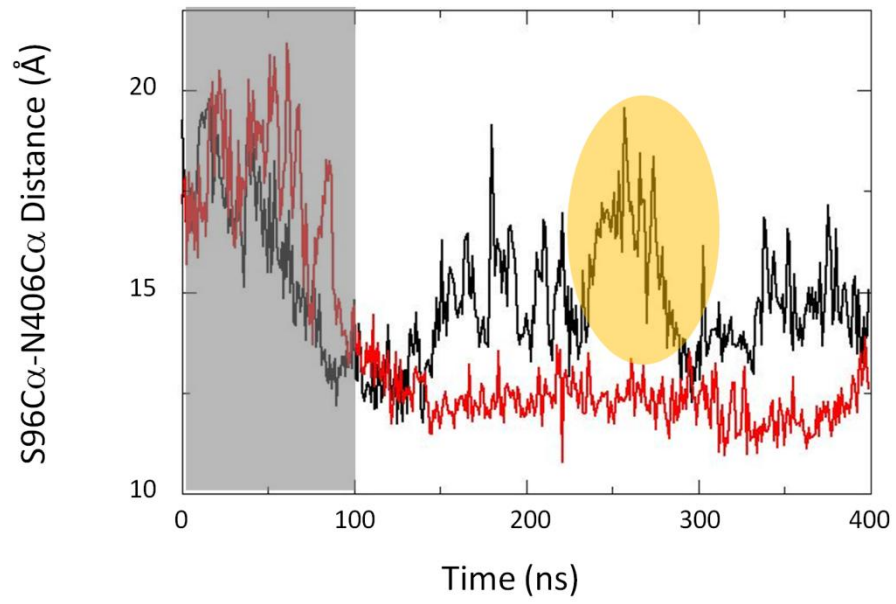

Figure S4.

### Free Enzyme Mode 1

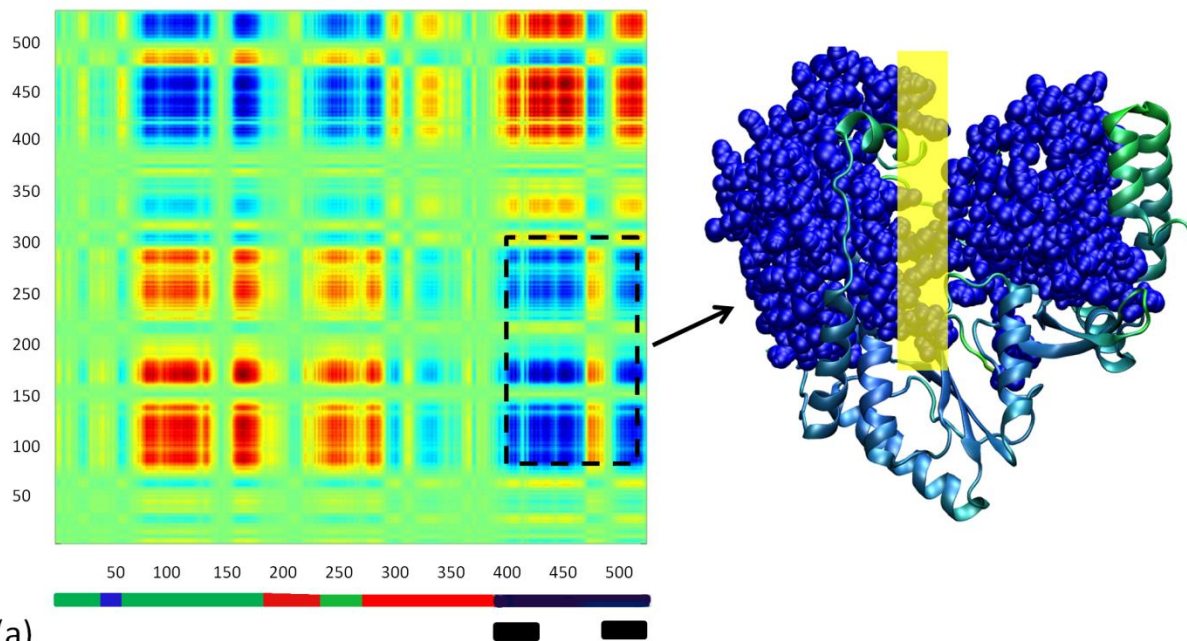

### Free Enzyme Mode 3

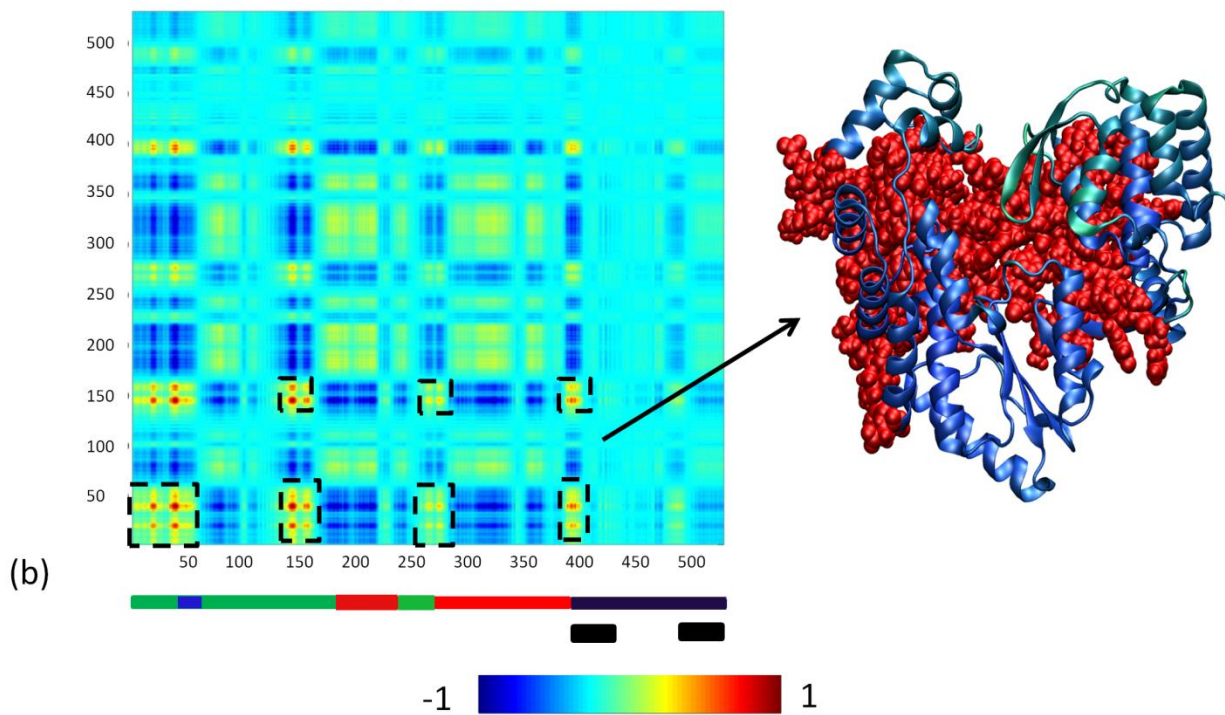

Figure S5.

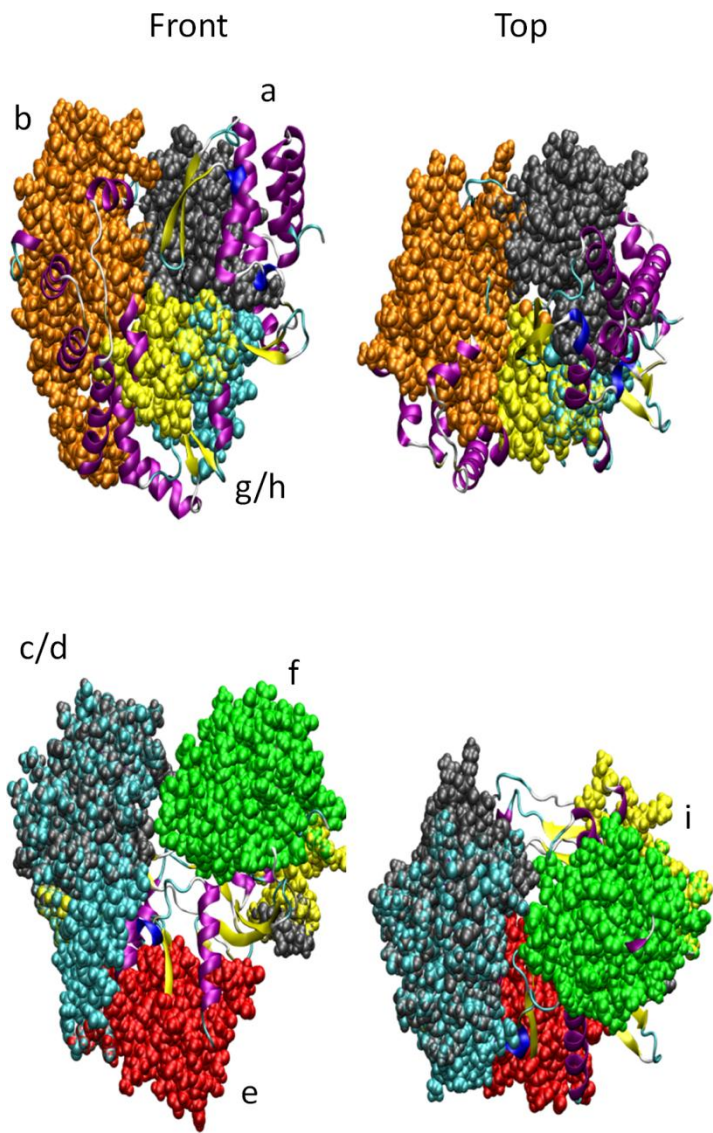

Supplement: NIHMS557287-supplement-Supplemental_Data.pdf [file NIHMS557287-supplement-Supplemental_Data.pdf]
